# Supplementary material for: Ultra-long silver nanowires prepared via hydrothermal synthesis enable efficient transparent heaters
Source: Royal Society of Chemistry journal article supplement (doi:10.1039/d2na00560c), 2022-01-01
Supplement: d2na00560c1.pdf [file d2na00560c1.pdf]

## SUPPORTING INFORMATION

### **Ultra-long silver nanowires prepared via hydrothermal synthesis enable efficient transparent heaters**

Fevzihan Basarir,<sup>a</sup> Swarnalok De,<sup>a</sup> Hamidreza Daghigh Shirazi<sup>a</sup> and Jaana Vapaavuori <sup>\*a</sup>

Department of Chemistry and Materials Science, Aalto University, P.O. Box 16100, FI-00076 AALTO,  
Finland

#### **\*Corresponding Author**

Prof. Jaana Vapaavuori

E-mail: [jaana.vapaavuori@aalto.fi](mailto:jaana.vapaavuori@aalto.fi)

**Table S1.** Summary of the AgNW synthesis conditions and the nanowire length

| Sample | AgNO <sub>3</sub> concentration (mM) | Reaction time (hour) | Reaction temperature (°C) | PVP MW (g/mol) | PVP concentration (mM) | Glucose concentration (mM) | CuCl <sub>2</sub> concentration (μM) | Max. length (μm) | Average length (μm) |
|--------|--------------------------------------|----------------------|---------------------------|----------------|------------------------|----------------------------|--------------------------------------|------------------|---------------------|
| 1      | 50                                   | 8                    | 160                       | 360K           | 75                     | 16.8                       | 20                                   | 47               | 18                  |
| 2      | 50                                   | 16                   | 160                       | 360K           | 75                     | 16.8                       | 20                                   | 127              | 58                  |
| 3      | 50                                   | 24                   | 160                       | 360K           | 75                     | 16.8                       | 20                                   | 253              | 105                 |
| 4      | 50                                   | 32                   | 160                       | 360K           | 75                     | 16.8                       | 20                                   | 273              | 106                 |
| 5      | 50                                   | 24                   | 150                       | 360K           | 75                     | 16.8                       | 20                                   | 70               | 27                  |
| 6      | 50                                   | 24                   | 160                       | 360K           | 75                     | 16.8                       | 20                                   | 253              | 105                 |
| 7      | 50                                   | 24                   | 170                       | 360K           | 75                     | 16.8                       | 20                                   | 160              | 69                  |
| 8      | 50                                   | 24                   | 180                       | 360K           | 75                     | 16.8                       | 20                                   | 51               | 22                  |
| 9      | 50                                   | 24                   | 160                       | 10K            | 75                     | 16.8                       | 20                                   | 78               | 30                  |
| 10     | 50                                   | 24                   | 160                       | 55K            | 75                     | 16.8                       | 20                                   | 141              | 63                  |
| 11     | 50                                   | 24                   | 160                       | 360K           | 75                     | 16.8                       | 20                                   | 253              | 105                 |
| 12     | 50                                   | 24                   | 160                       | 1300K          | 75                     | 16.8                       | 20                                   | 327              | 183                 |
| 13     | 50                                   | 24                   | 160                       | 360K           | 50                     | 16.8                       | 20                                   | 196              | 70                  |
| 14     | 50                                   | 24                   | 160                       | 360K           | 75                     | 16.8                       | 20                                   | 253              | 105                 |
| 15     | 50                                   | 24                   | 160                       | 360K           | 100                    | 16.8                       | 20                                   | 362              | 190                 |
| 16     | 50                                   | 24                   | 160                       | 360K           | 125                    | 16.8                       | 20                                   | 363              | 197                 |
| 17     | 50                                   | 24                   | 160                       | 360K           | 75                     | 5.6                        | 20                                   | 114              | 46                  |
| 18     | 50                                   | 24                   | 160                       | 360K           | 75                     | 11.2                       | 20                                   | 199              | 77                  |
| 19     | 50                                   | 24                   | 160                       | 360K           | 75                     | 16.8                       | 20                                   | 253              | 105                 |
| 20     | 50                                   | 24                   | 160                       | 360K           | 75                     | 22.4                       | 20                                   | 255              | 119                 |
| 21     | 50                                   | 24                   | 160                       | 360K           | 75                     | 16.8                       | 10                                   | 113              | 29                  |
| 22     | 50                                   | 24                   | 160                       | 360K           | 75                     | 16.8                       | 20                                   | 183              | 57                  |
| 23     | 50                                   | 24                   | 160                       | 360K           | 75                     | 16.8                       | 50                                   | 244              | 105                 |
| 24     | 50                                   | 24                   | 160                       | 360K           | 75                     | 16.8                       | 100                                  | 253              | 106                 |

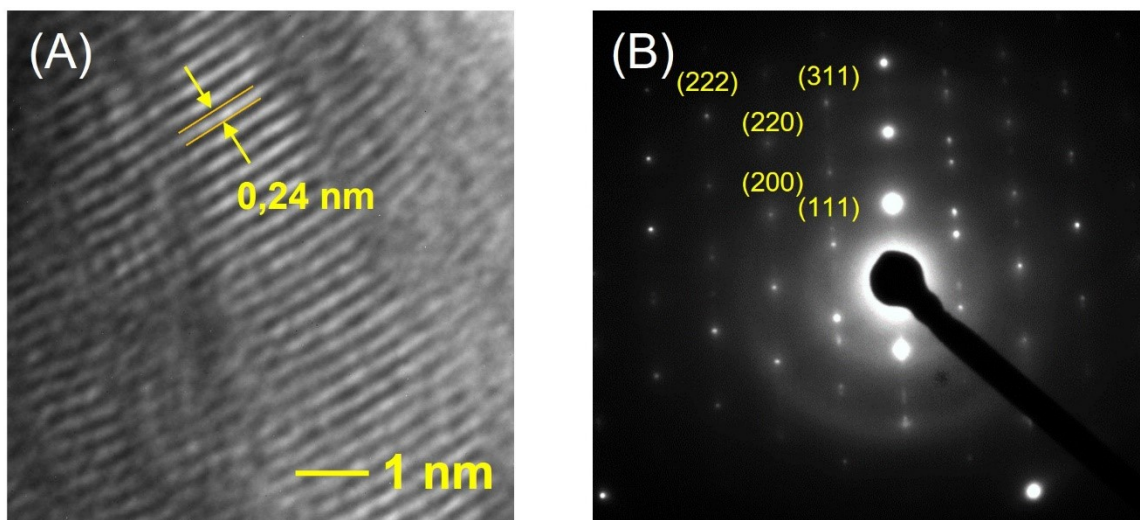

**Figure S1.** SAED pattern and electron diffraction pattern of the AgNWs.

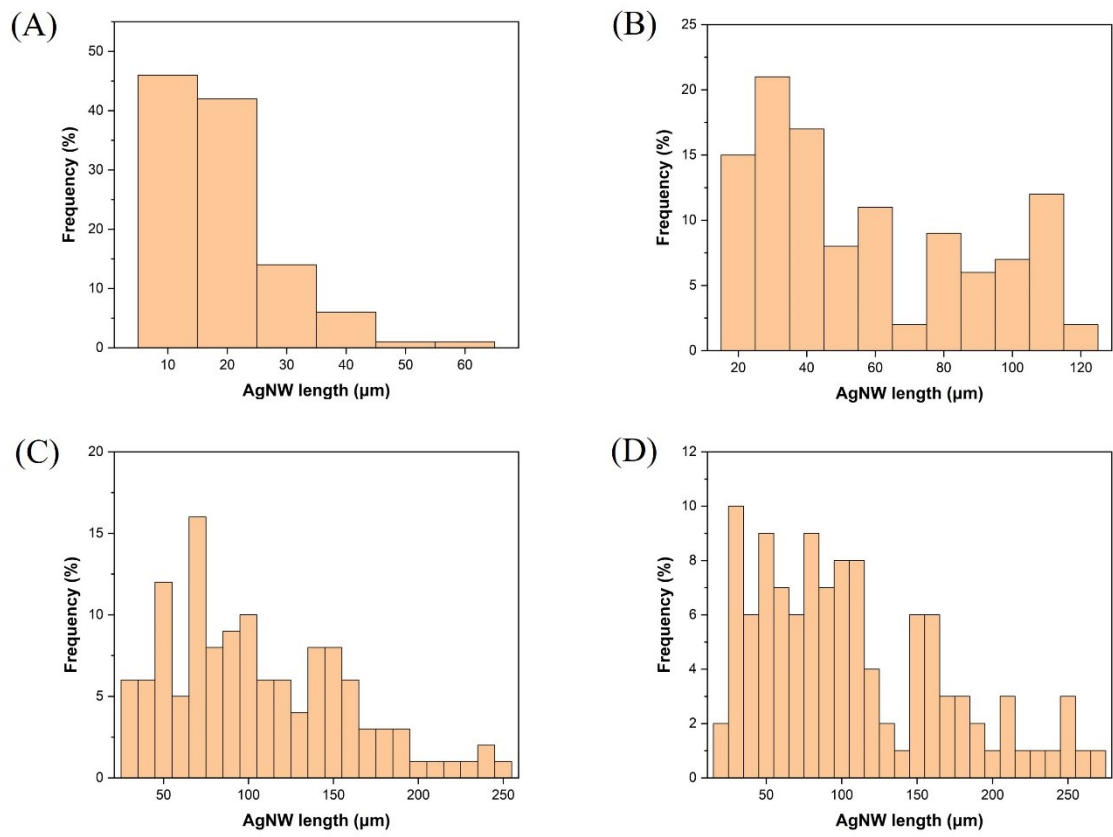

**Figure S2.** Length distribution of the AgNWs synthesized at (A) 8 hours, (B) 16 hours, (C) 24 hours and (D) 32 hours.

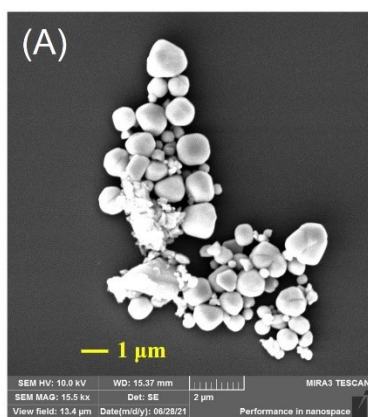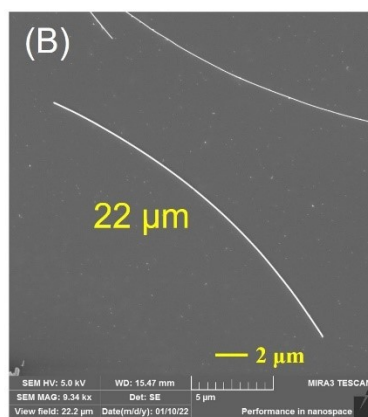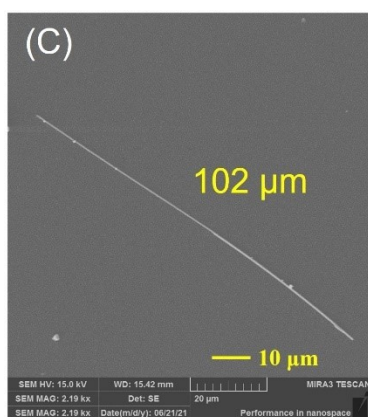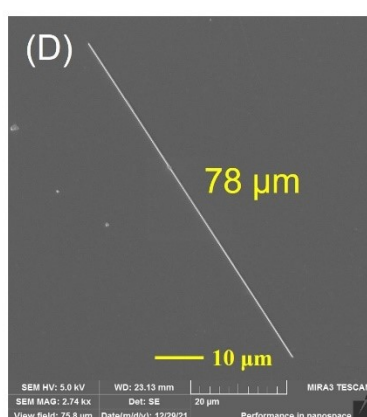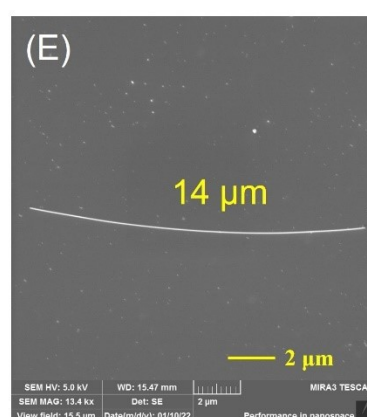

**Figure S3.** SEM images of the AgNWs synthesized at (A) 140 °C, (B) 150 °C, (C) 160 °C, (D) 170 °C and (E) 180 °C.

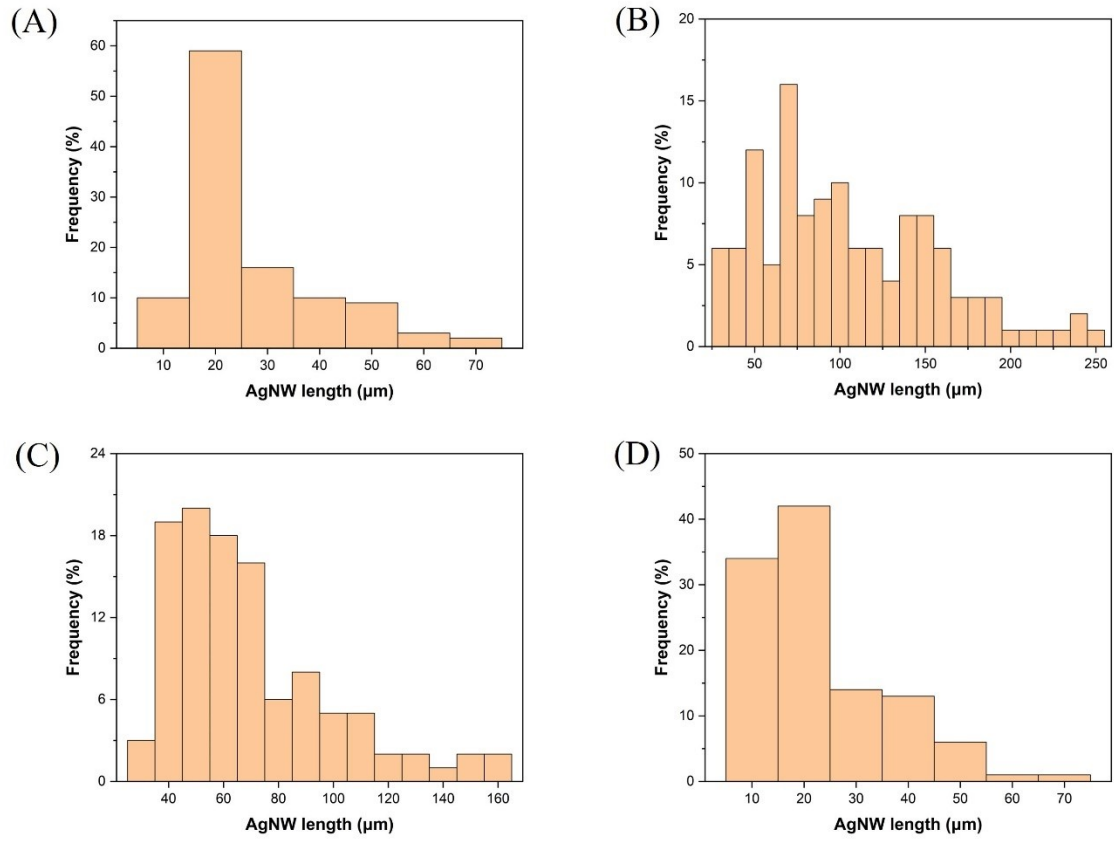

**Figure S4.** Length distribution of the AgNWs synthesized at (A) 150 °C, (B) 160 °C, (C) 170 °C and (D) 180 °C.

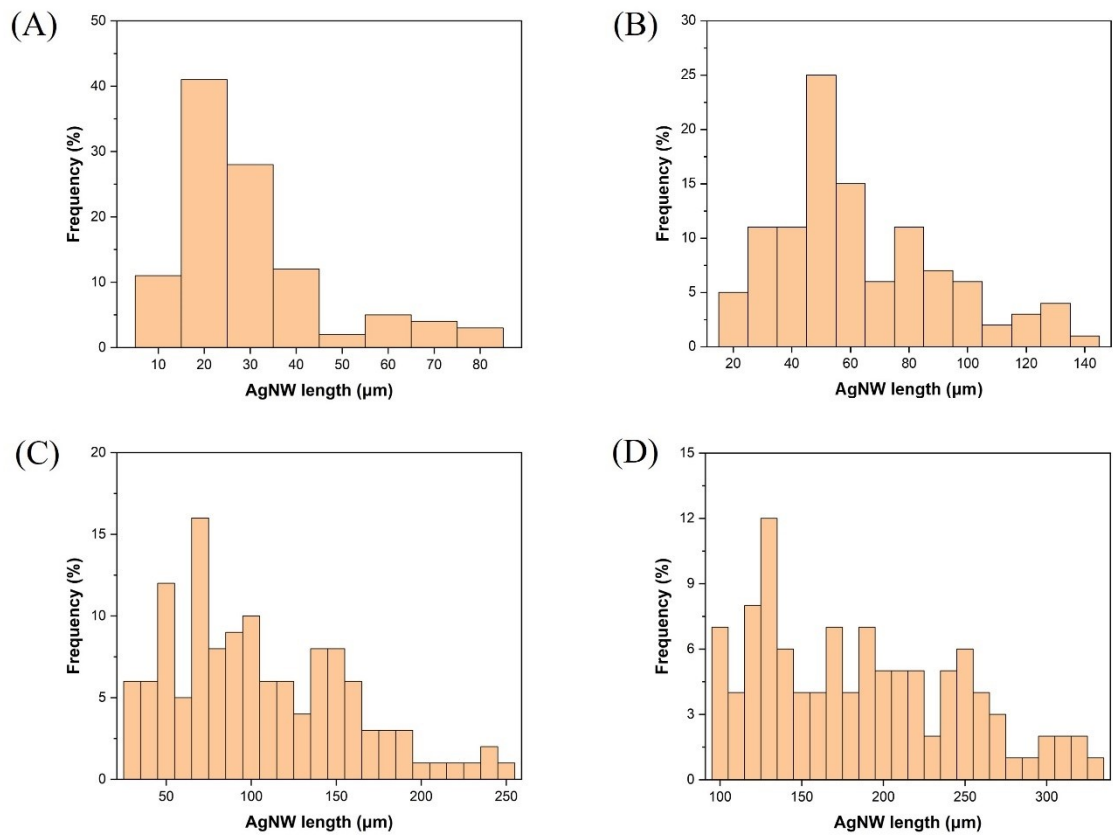

**Figure S5.** Length distribution of the AgNWs synthesized with PVP MW of (A) 10K, (B) 55K, (C) 360K and (D) 1300 K.

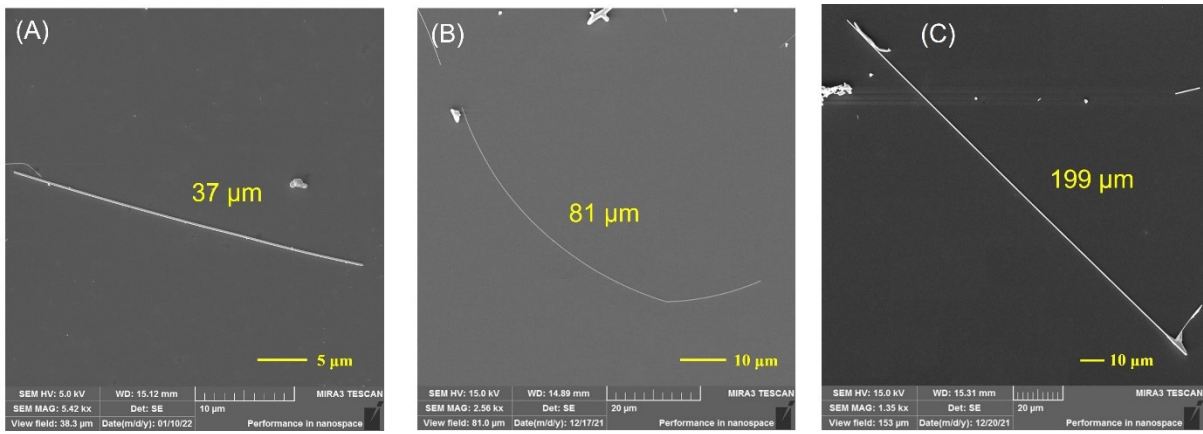

**Figure S6.** SEM images of the AgNWs synthesized with PVP MW of (A) 10K, (B) 55K and (C) 1300K.



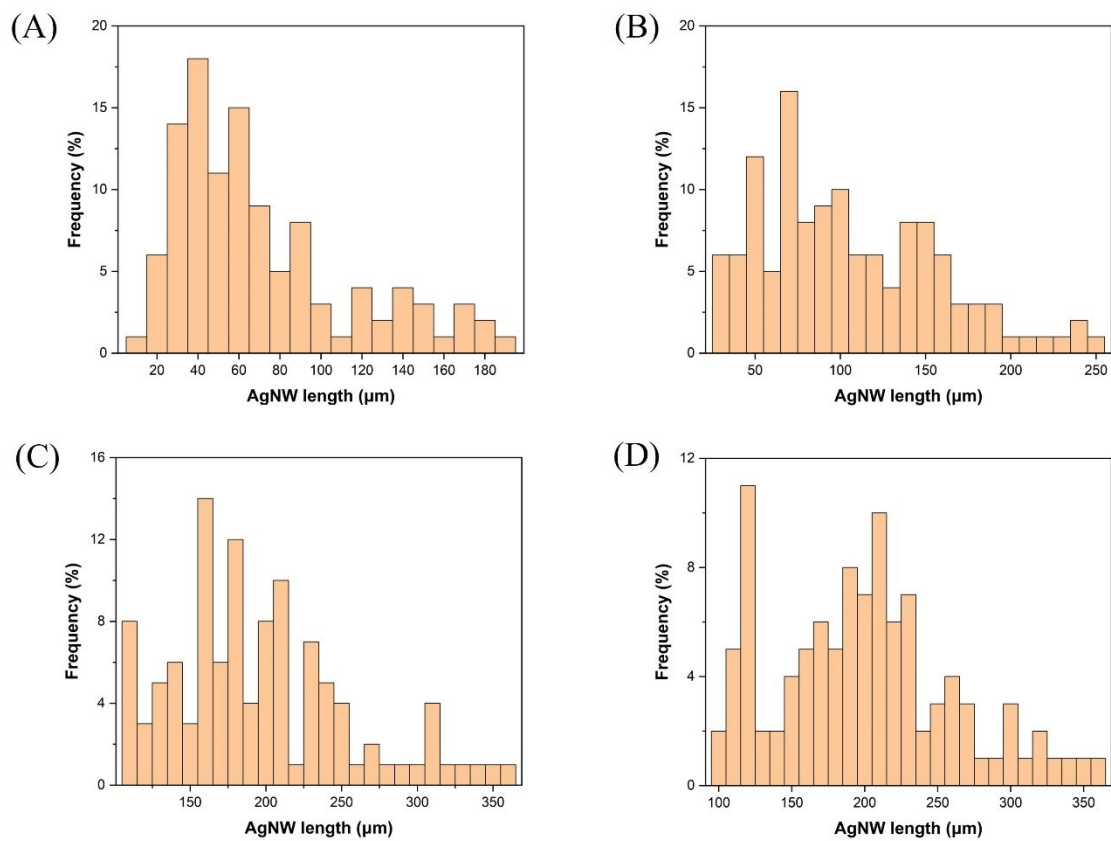

**Figure S7.** Length distribution of the AgNWs synthesized with PVP concentration of (A) 50 mM, (B) 75 mM, (C) 100 mM and (D) 125 mM.

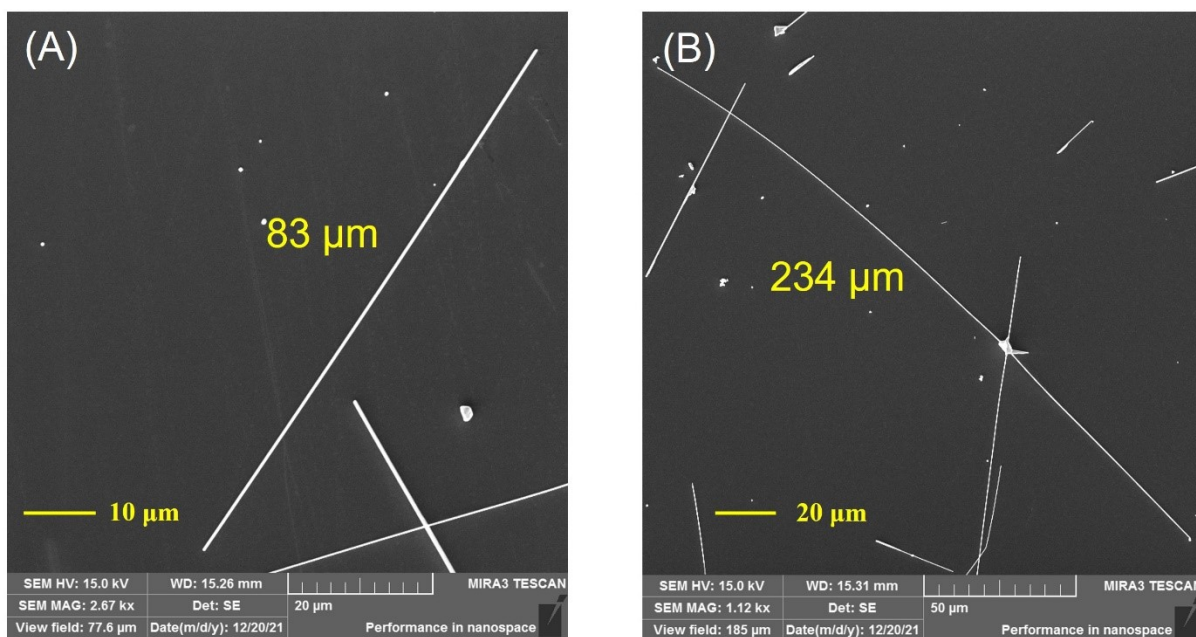

**Figure S8.** SEM images of the AgNWs synthesized with PVP (360K) concentration of (A) 50 and (B) 100 mM.

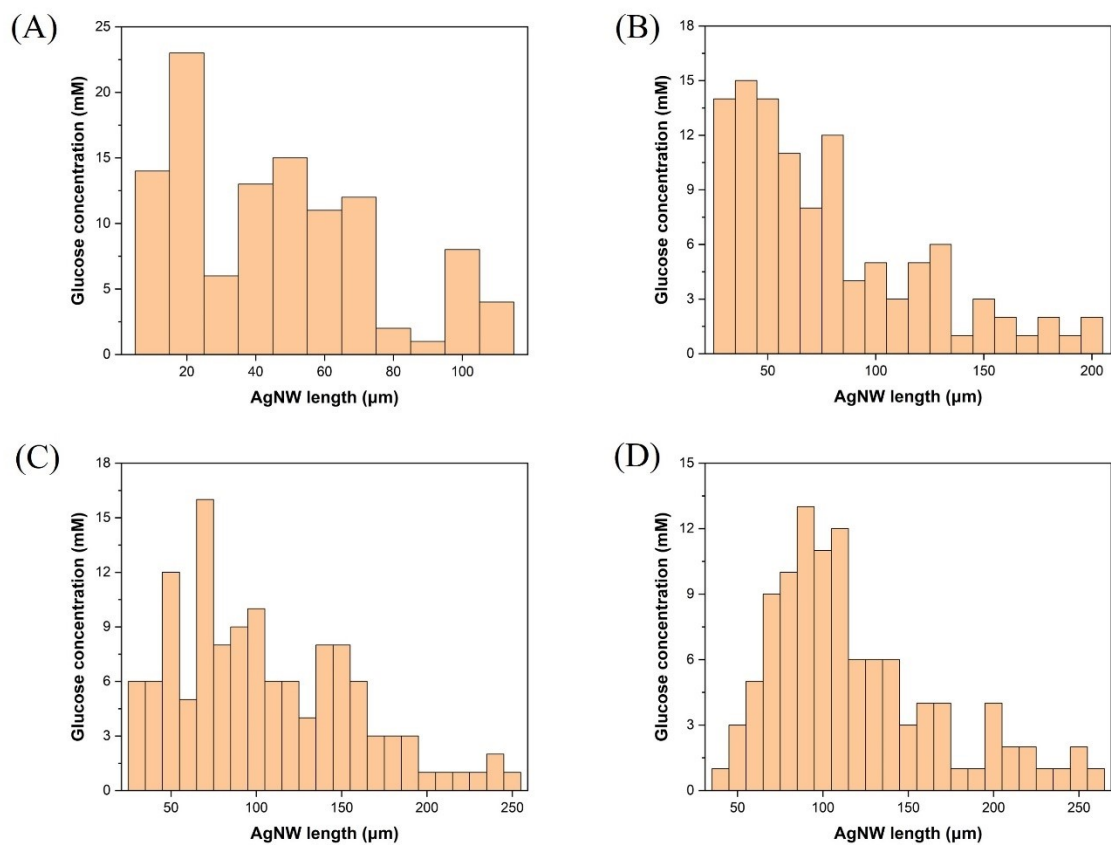

**Figure S9.** Length distribution of the AgNWs synthesized with glucose concentration of (A) 5.6 mM, (B) 11.2 mM, (C) 16.8 mM and (D) 22.4 mM.

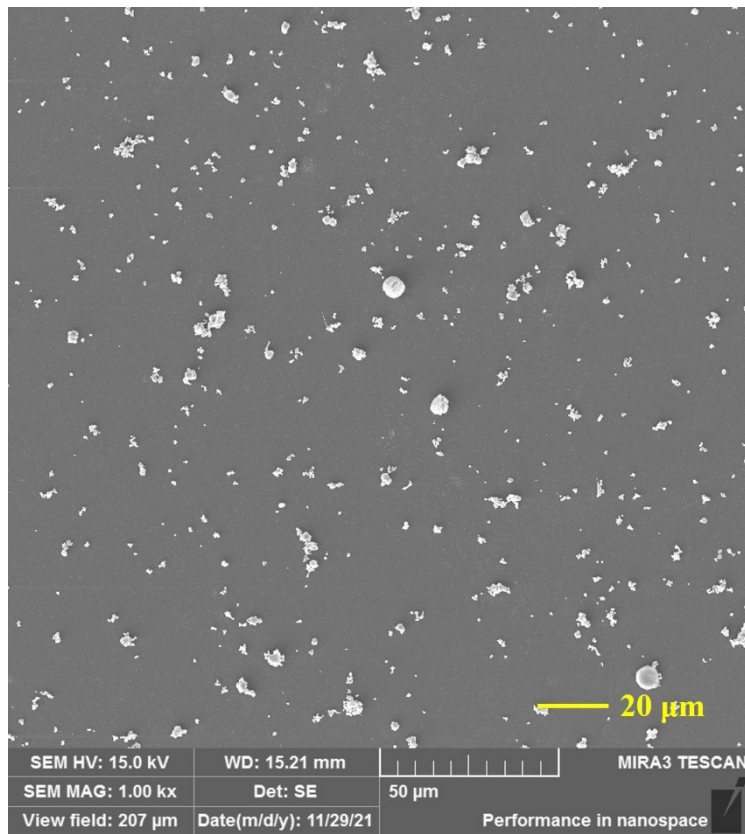

**Figure S10.** SEM images of the AgNWs synthesized with glucose concentration of 2.8 mM.

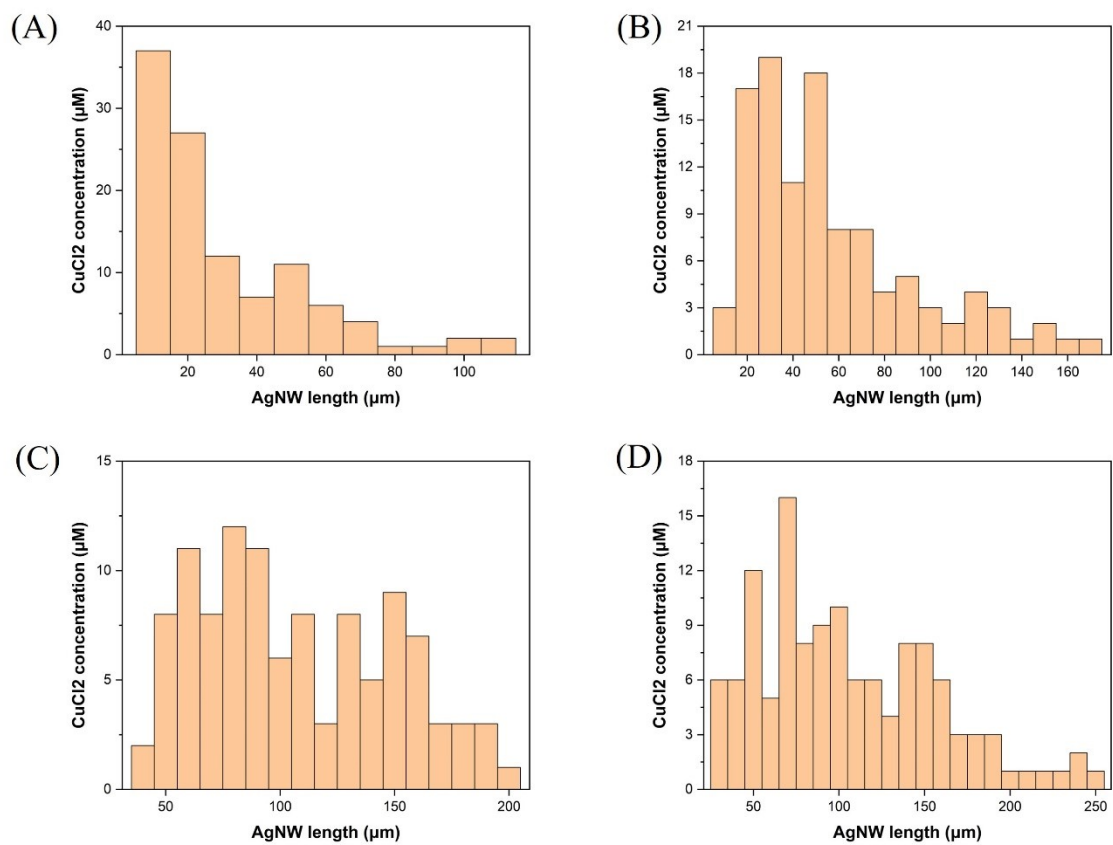

**Figure S11.** Length distribution of the AgNWs synthesized with CuCl<sub>2</sub> concentration of (A) 2 μM, (B) 4 μM, (C) 10 μM and (D) 20 μM.

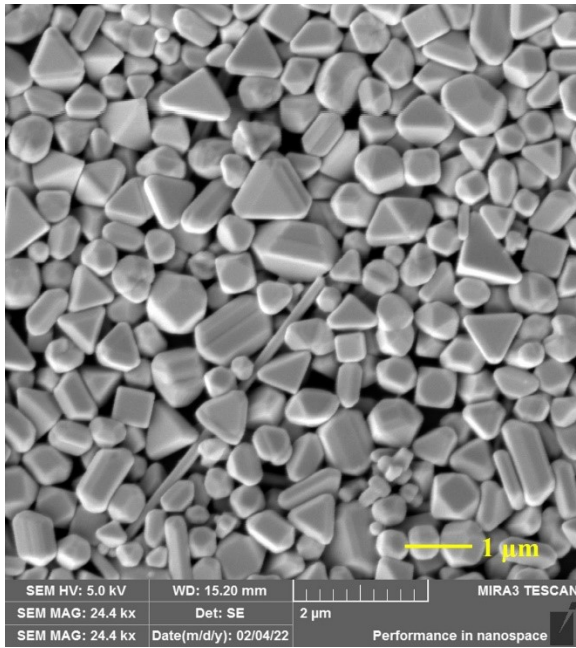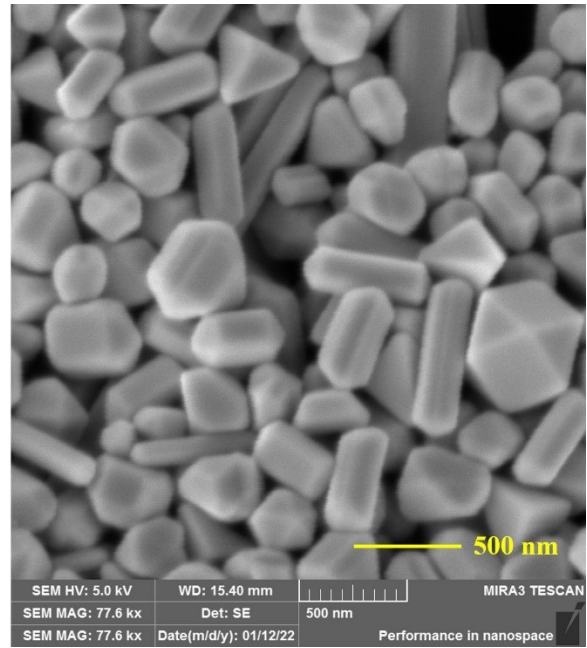

**Figure S12.** SEM images of the byproducts of the AgNWs synthesis with  $\text{CuCl}_2$  (A) and  $\text{FeCl}_3$  (B).

**Table S2.** Standard Reduction Potentials of the metal ions

|                               |                   |                  |         |
|-------------------------------|-------------------|------------------|---------|
| $\text{Cu}^{2+} + \text{e}^-$ | $\longrightarrow$ | $\text{Cu}^+$    | +0.16 V |
| $\text{Fe}^{3+} + \text{e}^-$ | $\longrightarrow$ | $\text{Fe}^{2+}$ | +0.77 V |
| $\text{Na}^+ + \text{e}^-$    | $\longrightarrow$ | $\text{Na(s)}$   | -2.71 V |

Reference: [Table of Standard Electrode Potentials \(gsu.edu\)](#)

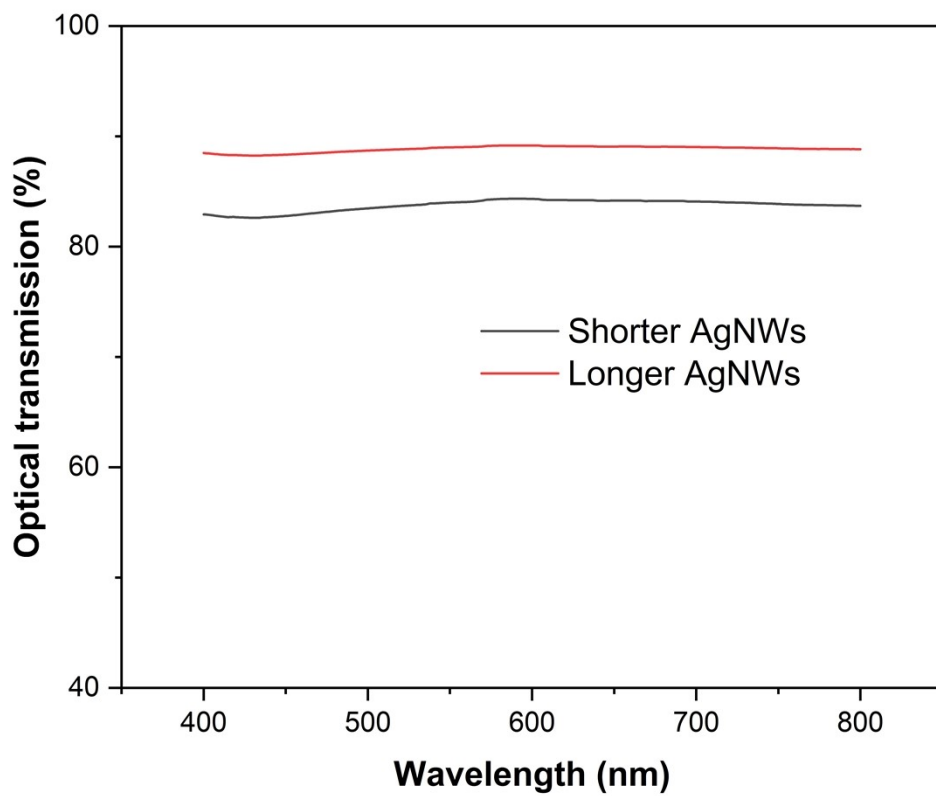

**Figure S13.** Optical transmission of AgNW films with a density of 0.24 gr/cm<sup>2</sup>.
